# Supplementary material
Source: publisher figshare collection journal article supplement (https://tandf.figshare.com/articles/dataset/_/14342416)

# **Foreign-accented speech elicits a late N400-effect during semantic processing** **SUPPLEMENTARY ANALYSIS**

## Factors:

- Accent (foreign, native)
- Correctness (correct, incorrect)
- Phoneme (/l/, /s/)
- Longitude (frontal, central, parietal)
- Latitude (left, medial, right)

## Regions of interest (9):

- Frontal left (FL): F7, F3, FC5
- Frontal medial (FM): Fp1, Fz, Fp2
- Frontal right (FR): F8, F4, FC6
- Central left (CL): T7, C3, CP5
- Central medial (CM): FC1, Cz, FC2
- Central right (CR): T8, C4, CP6
- Parietal left (PL): P7, P3, O1
- Parietal medial (PM): CP1, CP2, Pz
- Parietal right (PR): P8, P4, O2

## **FIRST TIME WINDOW (350-600 ms)**

## **Repeated Measures ANOVA**

|                         | Sum of Squares      | df             | Mean Square         | F                   | p                  |
|-------------------------|---------------------|----------------|---------------------|---------------------|--------------------|
| Accent                  | 6.816               | 1              | 6.816               | 0.482               | 0.492              |
| Residual                | 495.392             | 35             | 14.154              |                     |                    |
| Correctness             | 209.661             | 1              | 209.661             | 8.666               | 0.006              |
| Residual                | 846.778             | 35             | 24.194              |                     |                    |
| Phoneme                 | 111.266             | 1              | 111.266             | 10.314              | 0.003              |
| Residual                | 377.587             | 35             | 10.788              |                     |                    |
| Longitude               | 72.280 <sup>a</sup> | 2 <sup>a</sup> | 36.140 <sup>a</sup> | 10.838 <sup>a</sup> | <.001 <sup>a</sup> |
| Residual                | 233.410             | 70             | 3.334               |                     |                    |
| Latitude                | 71.621              | 2              | 35.811              | 16.267              | <.001              |
| Residual                | 154.097             | 70             | 2.201               |                     |                    |
| Accent * Correctness    | 2.059               | 1              | 2.059               | 0.147               | 0.703              |
| Residual                | 489.129             | 35             | 13.975              |                     |                    |
| Accent * Phoneme        | 21.865              | 1              | 21.865              | 2.385               | 0.131              |
| Residual                | 320.861             | 35             | 9.167               |                     |                    |
| Accent * Longitude      | 1.645 <sup>a</sup>  | 2 <sup>a</sup> | 0.822 <sup>a</sup>  | 0.571 <sup>a</sup>  | 0.567 <sup>a</sup> |
| Residual                | 100.733             | 70             | 1.439               |                     |                    |
| Accent * Latitude       | 1.554               | 2              | 0.777               | 0.906               | 0.409              |
| Residual                | 60.043              | 70             | 0.858               |                     |                    |
| Correctness * Phoneme   | 0.339               | 1              | 0.339               | 0.028               | 0.867              |
| Residual                | 416.124             | 35             | 11.889              |                     |                    |
| Correctness * Longitude | 1.293 <sup>a</sup>  | 2 <sup>a</sup> | 0.647 <sup>a</sup>  | 0.681 <sup>a</sup>  | 0.510 <sup>a</sup> |
| Residual                | 66.470              | 70             | 0.950               |                     |                    |
| Correctness * Latitude  | 3.636               | 2              | 1.818               | 2.395               | 0.099              |
| Residual                | 53.129              | 70             | 0.759               |                     |                    |
| Phoneme * Longitude     | 0.837 <sup>a</sup>  | 2 <sup>a</sup> | 0.419 <sup>a</sup>  | 0.291 <sup>a</sup>  | 0.748 <sup>a</sup> |

|                                              | Sum of Squares     | df             | Mean Square        | F                  | p                  |
|----------------------------------------------|--------------------|----------------|--------------------|--------------------|--------------------|
| Residual                                     | 100.581            | 70             | 1.437              |                    |                    |
| Phoneme * Latitude                           | 1.371 <sup>a</sup> | 2 <sup>a</sup> | 0.686 <sup>a</sup> | 1.069 <sup>a</sup> | 0.349 <sup>a</sup> |
| Residual                                     | 44.874             | 70             | 0.641              |                    |                    |
| Accent * Correctness * Phoneme               | 1.140              | 1              | 1.140              | 0.107              | 0.746              |
| Residual                                     | 373.631            | 35             | 10.675             |                    |                    |
| Accent * Correctness * Longitude             | 2.487 <sup>a</sup> | 2 <sup>a</sup> | 1.244 <sup>a</sup> | 1.025 <sup>a</sup> | 0.364 <sup>a</sup> |
| Residual                                     | 84.951             | 70             | 1.214              |                    |                    |
| Accent * Correctness * Latitude              | 0.597              | 2              | 0.298              | 0.516              | 0.599              |
| Residual                                     | 40.428             | 70             | 0.578              |                    |                    |
| Accent * Phoneme * Longitude                 | 7.982 <sup>a</sup> | 2 <sup>a</sup> | 3.991 <sup>a</sup> | 3.972 <sup>a</sup> | 0.023 <sup>a</sup> |
| Residual                                     | 70.339             | 70             | 1.005              |                    |                    |
| Accent * Phoneme * Latitude                  | 0.386              | 2              | 0.193              | 0.245              | 0.783              |
| Residual                                     | 55.122             | 70             | 0.787              |                    |                    |
| Accent * Longitude * Latitude                | 0.536 <sup>a</sup> | 4 <sup>a</sup> | 0.134 <sup>a</sup> | 0.787 <sup>a</sup> | 0.536 <sup>a</sup> |
| Residual                                     | 23.843             | 140            | 0.170              |                    |                    |
| Correctness * Phoneme * Longitude            | 0.521 <sup>a</sup> | 2 <sup>a</sup> | 0.261 <sup>a</sup> | 0.335 <sup>a</sup> | 0.716 <sup>a</sup> |
| Residual                                     | 54.402             | 70             | 0.777              |                    |                    |
| Correctness * Phoneme * Latitude             | 0.066              | 2              | 0.033              | 0.050              | 0.951              |
| Residual                                     | 45.668             | 70             | 0.652              |                    |                    |
| Correctness * Longitude * Latitude           | 0.952              | 4              | 0.238              | 1.495              | 0.207              |
| Residual                                     | 22.279             | 140            | 0.159              |                    |                    |
| Phoneme * Longitude * Latitude               | 1.787 <sup>a</sup> | 4 <sup>a</sup> | 0.447 <sup>a</sup> | 3.059 <sup>a</sup> | 0.019 <sup>a</sup> |
| Residual                                     | 20.445             | 140            | 0.146              |                    |                    |
| Accent * Correctness * Phoneme * Longitude   | 0.426 <sup>a</sup> | 2 <sup>a</sup> | 0.213 <sup>a</sup> | 0.132 <sup>a</sup> | 0.877 <sup>a</sup> |
| Residual                                     | 112.992            | 70             | 1.614              |                    |                    |
| Accent * Correctness * Phoneme * Latitude    | 3.732              | 2              | 1.866              | 2.327              | 0.105              |
| Residual                                     | 56.144             | 70             | 0.802              |                    |                    |
| Accent * Correctness * Longitude * Latitude  | 0.286 <sup>a</sup> | 4 <sup>a</sup> | 0.071 <sup>a</sup> | 0.438 <sup>a</sup> | 0.781 <sup>a</sup> |
| Residual                                     | 22.875             | 140            | 0.163              |                    |                    |
| Accent * Phoneme * Longitude * Latitude      | 0.942              | 4              | 0.235              | 1.661              | 0.162              |
| Residual                                     | 19.836             | 140            | 0.142              |                    |                    |
| Correctness * Phoneme * Longitude * Latitude | 0.569 <sup>a</sup> | 4 <sup>a</sup> | 0.142 <sup>a</sup> | 0.773 <sup>a</sup> | 0.544 <sup>a</sup> |
| Residual                                     | 25.768             | 140            | 0.184              |                    |                    |
| Accent * Correctness * Phoneme * Long * Lat  | 0.576 <sup>a</sup> | 4 <sup>a</sup> | 0.144 <sup>a</sup> | 0.750 <sup>a</sup> | 0.560 <sup>a</sup> |
| Residual                                     | 26.896             | 140            | 0.192              |                    |                    |

Note. Type III Sum of Squares

<sup>a</sup> Mauchly's test of sphericity indicates that the assumption of sphericity is violated ( $p < .05$ ).

#### Between Subjects Effects

|          | Sum of Squares | df | Mean Square | F | p |
|----------|----------------|----|-------------|---|---|
| Residual | 1251.979       | 35 | 35.771      |   |   |

Note. Type III Sum of Squares

**SECOND TIME WINDOW (600-900ms):****Repeated Measures ANOVA**

|                                  | Sum of Squares      | df             | Mean Square        | F                   | p                  |
|----------------------------------|---------------------|----------------|--------------------|---------------------|--------------------|
| Accent                           | 6.583               | 1              | 6.583              | 0.249               | 0.621              |
| Residual                         | 924.965             | 35             | 26.428             |                     |                    |
| Correctness                      | 41.107              | 1              | 41.107             | 1.817               | 0.186              |
| Residual                         | 791.709             | 35             | 22.620             |                     |                    |
| Phoneme                          | 8.668               | 1              | 8.668              | 0.653               | 0.424              |
| Residual                         | 464.280             | 35             | 13.265             |                     |                    |
| Longitude                        | 9.208 <sup>a</sup>  | 2 <sup>a</sup> | 4.604 <sup>a</sup> | 1.144 <sup>a</sup>  | 0.324 <sup>a</sup> |
| Residual                         | 281.701             | 70             | 4.024              |                     |                    |
| Latitude                         | 62.607              | 2              | 31.304             | 10.543              | <.001              |
| Residual                         | 207.830             | 70             | 2.969              |                     |                    |
| Accent * Correctness             | 16.552              | 1              | 16.552             | 0.782               | 0.383              |
| Residual                         | 740.837             | 35             | 21.167             |                     |                    |
| Accent * Phoneme                 | 5.738               | 1              | 5.738              | 0.485               | 0.491              |
| Residual                         | 413.749             | 35             | 11.821             |                     |                    |
| Accent * Longitude               | 0.434 <sup>a</sup>  | 2 <sup>a</sup> | 0.217 <sup>a</sup> | 0.125 <sup>a</sup>  | 0.883 <sup>a</sup> |
| Residual                         | 121.920             | 70             | 1.742              |                     |                    |
| Accent * Latitude                | 2.809               | 2              | 1.404              | 1.309               | 0.276              |
| Residual                         | 75.074              | 70             | 1.072              |                     |                    |
| Correctness * Phoneme            | 4.931               | 1              | 4.931              | 0.226               | 0.637              |
| Residual                         | 763.311             | 35             | 21.809             |                     |                    |
| Correctness * Longitude          | 0.481 <sup>a</sup>  | 2 <sup>a</sup> | 0.240 <sup>a</sup> | 0.170 <sup>a</sup>  | 0.844 <sup>a</sup> |
| Residual                         | 98.761              | 70             | 1.411              |                     |                    |
| Correctness * Latitude           | 1.405               | 2              | 0.703              | 0.731               | 0.485              |
| Residual                         | 67.314              | 70             | 0.962              |                     |                    |
| Phoneme * Longitude              | 1.390 <sup>a</sup>  | 2 <sup>a</sup> | 0.695 <sup>a</sup> | 0.673 <sup>a</sup>  | 0.513 <sup>a</sup> |
| Residual                         | 72.220              | 70             | 1.032              |                     |                    |
| Phoneme * Latitude               | 2.109               | 2              | 1.055              | 1.139               | 0.326              |
| Residual                         | 64.789              | 70             | 0.926              |                     |                    |
| Longitude * Latitude             | 39.804 <sup>a</sup> | 4 <sup>a</sup> | 9.951 <sup>a</sup> | 18.536 <sup>a</sup> | <.001 <sup>a</sup> |
| Residual                         | 75.159              | 140            | 0.537              |                     |                    |
| Accent * Correctness * Phoneme   | 0.048               | 1              | 0.048              | 0.004               | 0.953              |
| Residual                         | 477.217             | 35             | 13.635             |                     |                    |
| Accent * Correctness * Longitude | 7.345 <sup>a</sup>  | 2 <sup>a</sup> | 3.672 <sup>a</sup> | 3.695 <sup>a</sup>  | 0.030 <sup>a</sup> |
| Residual                         | 69.576              | 70             | 0.994              |                     |                    |
| Accent * Correctness * Latitude  | 0.152               | 2              | 0.076              | 0.106               | 0.900              |
| Residual                         | 50.478              | 70             | 0.721              |                     |                    |
| Accent * Phoneme * Longitude     | 2.074 <sup>a</sup>  | 2 <sup>a</sup> | 1.037 <sup>a</sup> | 0.772 <sup>a</sup>  | 0.466 <sup>a</sup> |
| Residual                         | 94.036              | 70             | 1.343              |                     |                    |
| Accent * Phoneme * Latitude      | 0.678               | 2              | 0.339              | 0.457               | 0.635              |
| Residual                         | 51.956              | 70             | 0.742              |                     |                    |
| Accent * Longitude * Latitude    | 0.565 <sup>a</sup>  | 4 <sup>a</sup> | 0.141 <sup>a</sup> | 0.649 <sup>a</sup>  | 0.628 <sup>a</sup> |
| Residual                         | 30.427              | 140            | 0.217              |                     |                    |

|                                                       | Sum of Squares     | df             | Mean Square        | F                  | p                  |
|-------------------------------------------------------|--------------------|----------------|--------------------|--------------------|--------------------|
| Correctness * Phoneme * Longitude                     | 0.508 <sup>a</sup> | 2 <sup>a</sup> | 0.254 <sup>a</sup> | 0.215 <sup>a</sup> | 0.807 <sup>a</sup> |
| Residual                                              | 82.640             | 70             | 1.181              |                    |                    |
| Correctness * Phoneme * Latitude                      | 0.924              | 2              | 0.462              | 0.553              | 0.578              |
| Residual                                              | 58.504             | 70             | 0.836              |                    |                    |
| Correctness * Longitude * Latitude                    | 1.028 <sup>a</sup> | 4 <sup>a</sup> | 0.257 <sup>a</sup> | 1.100 <sup>a</sup> | 0.359 <sup>a</sup> |
| Residual                                              | 32.695             | 140            | 0.234              |                    |                    |
| Phoneme * Longitude * Latitude                        | 0.134 <sup>a</sup> | 4 <sup>a</sup> | 0.034 <sup>a</sup> | 0.164 <sup>a</sup> | 0.956 <sup>a</sup> |
| Residual                                              | 28.559             | 140            | 0.204              |                    |                    |
| Accent * Correctness * Phoneme * Longitude            | 0.054 <sup>a</sup> | 2 <sup>a</sup> | 0.027 <sup>a</sup> | 0.016 <sup>a</sup> | 0.984 <sup>a</sup> |
| Residual                                              | 116.460            | 70             | 1.664              |                    |                    |
| Accent * Correctness * Phoneme * Latitude             | 2.534              | 2              | 1.267              | 1.303              | 0.278              |
| Residual                                              | 68.057             | 70             | 0.972              |                    |                    |
| Accent * Correctness * Longitude * Latitude           | 0.342 <sup>a</sup> | 4 <sup>a</sup> | 0.085 <sup>a</sup> | 0.476 <sup>a</sup> | 0.753 <sup>a</sup> |
| Residual                                              | 25.130             | 140            | 0.180              |                    |                    |
| Accent * Phoneme * Longitude * Latitude               | 1.729              | 4              | 0.432              | 2.184              | 0.074              |
| Residual                                              | 27.706             | 140            | 0.198              |                    |                    |
| Correctness * Phoneme * Longitude * Latitude          | 0.686              | 4              | 0.171              | 0.839              | 0.503              |
| Residual                                              | 28.602             | 140            | 0.204              |                    |                    |
| Accent * Correctness * Phoneme * Longitude * Latitude | 0.709 <sup>a</sup> | 4 <sup>a</sup> | 0.177 <sup>a</sup> | 0.698 <sup>a</sup> | 0.595 <sup>a</sup> |
| Residual                                              | 35.564             | 140            | 0.254              |                    |                    |

*Note.* Type III Sum of Squares

<sup>a</sup> Mauchly's test of sphericity indicates that the assumption of sphericity is violated ( $p < .05$ ).

#### Between Subjects Effects

|          | Sum of Squares | df | Mean Square | F | p |
|----------|----------------|----|-------------|---|---|
| Residual | 1358.543       | 35 | 38.816      |   |   |

*Note.* Type III Sum of Squares

## SUPPLEMENTARY FIGURES

**Figure A:** Average ERP responses observed across all conditions for both accents in the three ROIs: parietal left (PL), parietal medial (PM) and parietal right (PR). Shaded areas represent the standard error across participants for each condition. The time-window with significant Accent \* Correctness effect (600-900 ms) is highlighted in yellow.

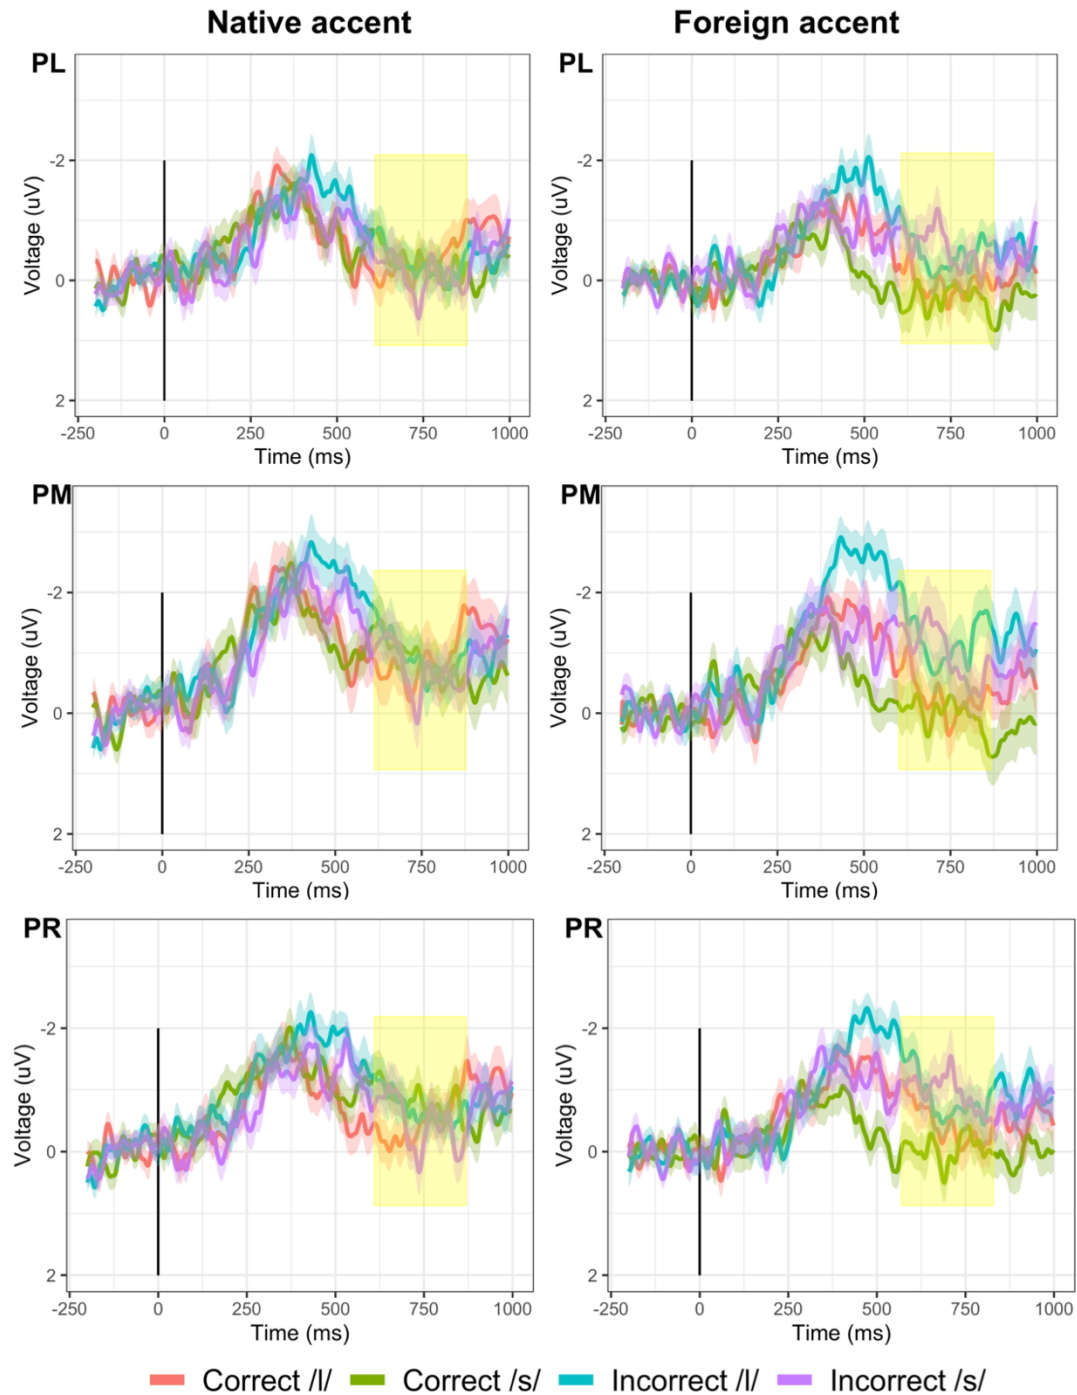

**Figure B:** *Left:* Difference waves from the main analysis across the three ROIs. Shaded areas represent the standard error across participants for each condition. The time-window with the significant Accent \* Correctness effect (600-900 ms) is highlighted in yellow. *Right:* Individual variation in the N400 effect in both time windows. *Note:* For all figures, the voltage value for N400 effect was obtained by subtracting the correct from the incorrect conditions, collapsed across phoneme types (/l/ or /s/), as the factor of error typicality did not interact with the Accent \* Correctness interaction.

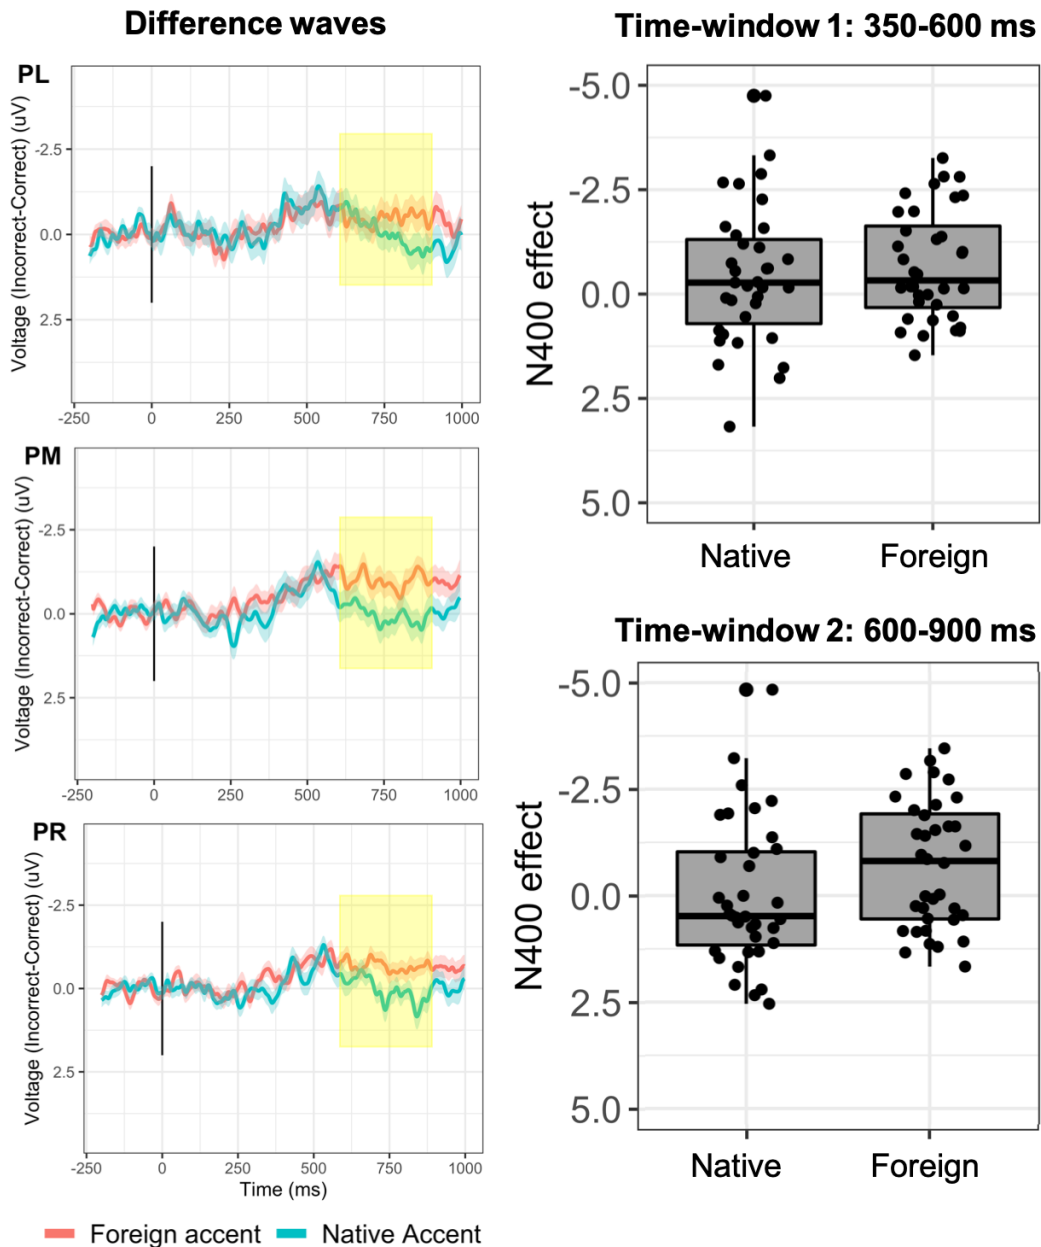

**Figure C:** *Left:* Average ERP responses observed across all conditions for both accents in Block 1 (top) and Block 2 (bottom). *Right:* Difference waves in both blocks. The voltage value for N400 effect was obtained by subtracting the correct from the incorrect conditions, collapsed across phoneme types (/l/ or /s/). The time-window with significant effect of Accent by Block (350-600 ms) is highlighted in yellow. *Note:* For all figures, the ERP response corresponds to an average across the three ROIs, as the topographic factor of Latitude was not included in the Block analysis. Shaded areas represent the standard error across participants for each condition.

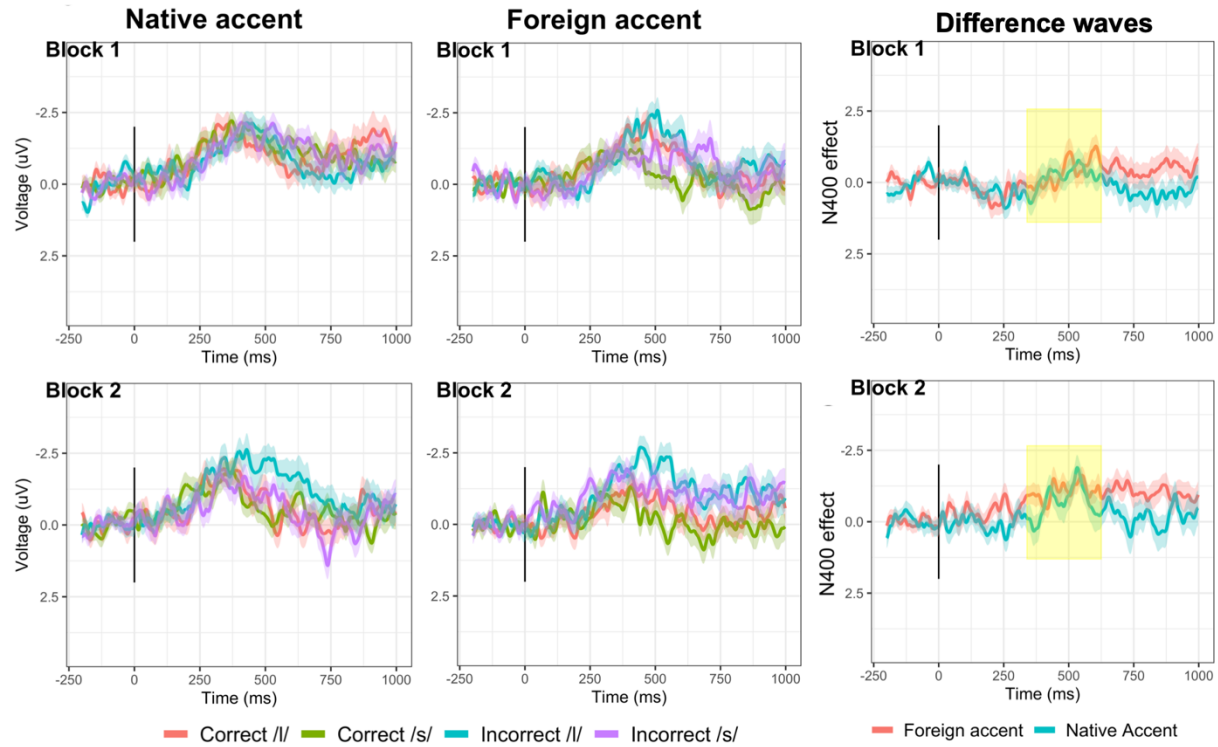

Supplement: Supplementary file 2 [file 1]
