# Supplementary material
Source: publisher figshare collection journal article supplement (https://tandf.figshare.com/articles/dataset/_/14342416)
Supplement: Supplementary file 1 [file 1]

**Foreign-accented speech elicits a late N400-effect during semantic processing  
STIMULI (AFTER NORMING)**

**Sentences with critical /l/-phoneme**

| Word  | Correct version | Sentence                                                 | Semantic type |
|-------|-----------------|----------------------------------------------------------|---------------|
| alma  | --              | Esa chica es el alma de la fiesta.                       | correct       |
| alma  | --              | El pecado del alma es castigado.                         | correct       |
| alma  | arma            | Ese chico sepultó el alma homicida.                      | incorrect     |
| alma  | arma            | El fogueo del alma es malo.                              | incorrect     |
| cala  | --              | Visité la cala que me dijiste.                           | correct       |
| cala  | --              | Fui a la cala el año pasado.                             | correct       |
| cala  | cara            | Tuvo la cala feliz todo el tiempo.                       | incorrect     |
| cala  | cara            | Él puso la cala de loco ese día.                         | incorrect     |
| caldo | --              | Su abuela hizo el caldo más delicioso.                   | correct       |
| caldo | --              | Él hizo el caldo de pollo.                               | correct       |
| caldo | cardo           | El chico ahogó el caldo de su abuela.                    | incorrect     |
| caldo | cardo           | Vive mucho el caldo si lo cuidas.                        | incorrect     |
| calma | --              | Él le suplicó tu calma al cielo.                         | correct       |
| calma | --              | Ella tuvo pocos episodios de calma después del suceso.   | correct       |
| calma | karma           | Si es malo tu calma, vete ya mismo.                      | incorrect     |
| calma | karma           | Deja que la ley de calma te guíe.                        | incorrect     |
| culo  | --              | El bebé lleva paspado el culo desde que lo cuida su tío. | correct       |
| culo  | --              | Lleva gafas de culo de botella.                          | correct       |
| culo  | curro           | Se te hace difícil el culo que haces.                    | incorrect     |
| culo  | curro           | Tu compi de culo se va ya.                               | incorrect     |
| ela   | --              | El médico le detectó la ela hace años.                   | correct       |
| ela   | --              | El médico habla de la ela hoy a las siete y media.       | correct       |
| ela   | era             | Tu abuela es de la ela de los diplodocus.                | incorrect     |
| ela   | era             | Esa chaqueta es de la ela pasada.                        | incorrect     |
| gala  | --              | Tuvo hoy la gala tu amiga.                               | correct       |
| gala  | --              | Asistió a la gala sola.                                  | correct       |
| gala  | garra           | Afilada está la gala del gato.                           | incorrect     |
| gala  | garra           | Se afiló la gala muchas veces.                           | incorrect     |
| halo  | --              | Te deja casi ciego el halo de luz.                       | correct       |
| halo  | --              | Vio la luz del halo del ocaso.                           | correct       |
| halo  | aro             | De su boca sale el halo de humo.                         | incorrect     |
| halo  | aro             | Esa joya cuelga del halo de su lóbulo.                   | incorrect     |
| hielo | --              | El sol deshizo el techo de hielo del capitel.            | correct       |
| hielo | --              | Esta bebida lleva mucho hielo y alcohol.                 | correct       |
| hielo | hierro          | El médico le dio pastillas de hielo después del test.    | incorrect     |
| hielo | hierro          | Esa espada lleva mucho hielo y joyas.                    | incorrect     |

|      |       |                                                          |           |
|------|-------|----------------------------------------------------------|-----------|
| lata | --    | Ese chico bebe muchas latas de alcohol.                  | correct   |
| lata | --    | Ese tocado está hecho de latas muy feas.                 | correct   |
| lata | rata  | Tu gato caza muchas latas cada día.                      | incorrect |
| lata | rata  | Habló de la plaga de latas de esa ciudad.                | incorrect |
| led  | --    | Titila cada vez más su led violeta.                      | correct   |
| led  | --    | Le llegó algo al móvil ya que titila su led azul.        | correct   |
| led  | red   | Solicitó más megas de su led de wifi.                    | incorrect |
| led  | red   | Pidió hoy a su amigo la clave de su led de wifi.         | incorrect |
| ley  | --    | Hoy día esto es ley y así lo acatas.                     | correct   |
| ley  | --    | Eso ya es ley desde hoy.                                 | correct   |
| ley  | rey   | Ese chico ya es ley a su edad.                           | incorrect |
| ley  | rey   | Su abuelo es ley de todo el país.                        | incorrect |
| lima | --    | Pulió todo y gastó la lima de su jefe.                   | correct   |
| lima | --    | Afiló el metal de esa lima y la colocó bajo los clavos.  | correct   |
| lima | rima  | Compuso él solo toda la lima del tema.                   | incorrect |
| lima | rima  | Publicó hace ya años esa lima fácil y a pocos les gustó. | incorrect |
| lobo | --    | Ha aullado el lobo del bosque.                           | correct   |
| lobo | --    | Si ese aullido es del lobo es que está lejos de aquí.    | correct   |
| lobo | robo  | Ha ideado el lobo él solo.                               | incorrect |
| lobo | robo  | Ese es el culpable del lobo del jueves pasado.           | incorrect |
| loca | --    | Tu tía es la loca de los gatos.                          | correct   |
| loca | --    | El médico sedó a la loca de la sala aislada.             | correct   |
| loca | roca  | Él demolió hoy la loca que le pedí.                      | incorrect |
| loca | roca  | Ese chico picó hoy la loca todo el día bajo el sol.      | incorrect |
| mal  | --    | Ese chico es el mal de toda su familia.                  | correct   |
| mal  | --    | Divulgó el mal chisme y se fue.                          | correct   |
| mal  | mar   | El abuelo visitó el mal muchas veces.                    | incorrect |
| mal  | mar   | Escuchó el mal desde su casa.                            | incorrect |
| mulo | --    | Muy quisquilloso es el mulo de tu amigo.                 | correct   |
| mulo | --    | Es salvaje y malo el mulo suyo.                          | correct   |
| mulo | muro  | Hoy ha demolido el mulo de su abuelo.                    | incorrect |
| mulo | muro  | Se cae a pedazos el mulo de su casa.                     | incorrect |
| pala | --    | Está muy oxidada la pala que usa.                        | correct   |
| pala | --    | Usó la pala de su amiga y cavó el hoyo.                  | correct   |
| pala | parra | Dio muchas uvas la pala este año.                        | incorrect |
| pala | parra | Fumigó la pala hace días.                                | incorrect |
| palo | --    | A ese chaval le gustó mucho el palo y jugó todo el día.  | correct   |
| palo | --    | Lo colgó del palo hace días y lo olvidó.                 | correct   |
| palo | paro  | La estadística dice que este mes el palo está a tope.    | incorrect |
| palo | paro  | Está agobiado del palo ya que lleva allí mucho tiempo.   | incorrect |

|        |        |                                                         |           |
|--------|--------|---------------------------------------------------------|-----------|
| pelo   | --     | Se depiló el pelo del bigote.                           | correct   |
| pelo   | --     | Alisó su pelo aquel día.                                | correct   |
| pelo   | perro  | Se escapó el pelo de tu tía.                            | incorrect |
| pelo   | perro  | Cazó su pelo a dos gatos.                               | incorrect |
| polo   | --     | Yo visité los polos y sus osos.                         | correct   |
| polo   | --     | Va mucho a los polos y estudia a los osos.              | correct   |
| polo   | poro   | Tuvo secos los polos de su piel.                        | incorrect |
| polo   | poro   | Se cuida mucho los polos desde hace mucho tiempo.       | incorrect |
| sol    | --     | Aquel día hizo sol y fuimos a la playa.                 | correct   |
| sol    | --     | Eso fue aquel día que hizo sol y luego llovió.          | correct   |
| sol    | sor    | Ella se hizo sol a los dieciocho años.                  | incorrect |
| sol    | sor    | Ella le dijo que se hizo sol debido a su fe.            | incorrect |
| suelo  | --     | Limpia el suelo y la mesa.                              | correct   |
| suelo  | --     | Es de baldosas el suelo de su casa.                     | correct   |
| suelo  | suero  | Coge el suelo y las gasas.                              | incorrect |
| suelo  | suero  | Ella se tomó el suelo que le dijo el médico.            | incorrect |
| tala   | --     | El juez halló al culpable de la tala del bosque.        | correct   |
| tala   | --     | Empieza la tala del bosque.                             | correct   |
| tala   | tara   | Tu abuela fue lista y vio la tala de la falda.          | incorrect |
| tala   | tara   | Busca la tala de todos los paquetes.                    | incorrect |
| talado | --     | El bosque ha sido talado este mediodía.                 | correct   |
| talado | --     | Mi sauce es talado cada año.                            | correct   |
| talado | tarado | Ese chico ha sido talado desde que dejó el colegio.     | incorrect |
| talado | tarado | Mi tío es talado, dice que ve hadas.                    | incorrect |
| tela   | --     | La modista fue al quiosco y pidió más telas de calidad. | correct   |
| tela   | --     | La modista le cosió más telas a ese vestido.            | correct   |
| tela   | tera   | Cambió el pc hace poco y pidió más telas de velocidad.  | incorrect |
| tela   | tera   | Ese disco es de más telas que el tuyo.                  | incorrect |
| tila   | --     | Bébetela tila que te hice.                              | correct   |
| tila   | --     | Tómate esa tila ya mismo.                               | correct   |
| tila   | tira   | Pegó la tila adhesiva al vestido.                       | incorrect |
| tila   | tira   | Pega esa tila de tela allí.                             | incorrect |
| toldo  | --     | Puso el toldo este otoño.                               | correct   |
| toldo  | --     | Se descosió el toldo debido al mal tiempo.              | correct   |
| toldo  | tordo  | Pía el toldo cada día más.                              | incorrect |
| toldo  | tordo  | Hoy pió el toldo al lado de su casa.                    | incorrect |

### Sentences with critical /s/-phoneme

| Word     | Correct version | Sentence                                                         | Semantic type |
|----------|-----------------|------------------------------------------------------------------|---------------|
| asa      | --              | Coge el asa de allí.                                             | correct       |
| asa      | --              | Se cayó su taza y le pegó el asa y la dejó muy chula.            | correct       |
| asa      | ana             | Aplica el asa como medida.                                       | incorrect     |
| asa      | ana             | Estudió que hace años la medida fue el asa y le gustó la idea.   | incorrect     |
| casa     | --              | Alquiló la casa el otoño pasado                                  | correct       |
| casa     | --              | El alcalde visitó sus casas después de su campaña.               | correct       |
| casa     | cana            | Cepilló la casa bajo su flequillo.                               | incorrect     |
| casa     | cana            | Tu abuela tiñó sus casas como cada mes.                          | incorrect     |
| castidad | --              | Él hizo voto de castidad hace años.                              | correct       |
| castidad | --              | Cumplió su voto de castidad hasta el último de sus días.         | correct       |
| castidad | cantidad        | Está al lado de castidad de sitios.                              | incorrect     |
| castidad | cantidad        | Solicitó la hipoteca de castidad fija al mes.                    | incorrect     |
| casto    | --              | El chico fue el casto de su familia.                             | correct       |
| casto    | --              | Fue el limpio y el casto de sus amigos.                          | correct       |
| casto    | canto           | Escuchamos aquel día el casto de las aves.                       | incorrect     |
| casto    | canto           | Ese día todos oímos el casto de tus aves.                        | incorrect     |
| costado  | --              | Sujetó el bolso al costado y huyó.                               | correct       |
| costado  | --              | Sostuvo la botella al costado y se le cayó.                      | correct       |
| costado  | contado         | Me pagó todo al costado y se fue.                                | incorrect     |
| costado  | contado         | Pagó la chaqueta al costado y agotó su capital.                  | incorrect     |
| dos      | --              | Eso pasó el dos de julio.                                        | correct       |
| dos      | --              | La huelga fue de dos días.                                       | correct       |
| dos      | don             | Te vigila el dos sabelotodo.                                     | incorrect     |
| dos      | don             | Es la esposa de dos Miguel.                                      | incorrect     |
| este     | --              | Hay más viñedos al este de mi campo.                             | correct       |
| este     | --              | El chico iba hacia el este la última vez que la vi.              | correct       |
| este     | ente            | Él odia más al este de mi tío.                                   | incorrect     |
| este     | ente            | Dijo que la sigue el este a todos lados.                         | incorrect     |
| gasa     | --              | Empapó las gasas que había debajo de la camilla y te las aplicó. | correct       |
| gasa     | --              | Limpió sus gasas allí.                                           | correct       |
| gasa     | gana            | Domó las gasas ese día.                                          | incorrect     |
| gasa     | gana            | Mitigó sus gasas de viaje.                                       | incorrect     |
| justa    | --              | Ese caballo fue el as de la justa de este año.                   | correct       |
| justa    | --              | Su caballo fue expulsado de la justa debido a su mal estado.     | correct       |
| justa    | junta           | Lo que discuta y decida hoy la justa es sabio.                   | incorrect     |
| justa    | junta           | La compañía hace cada mes la justa y habla de todos estos temas. | incorrect     |
| justo    | --              | Lo que dijo fue muy justo y lo acato.                            | correct       |
| justo    | --              | El sueldo que yo deseo es más justo que el que tú me das.        | correct       |
| justo    | junto           | He pasado mi vida muy justo a ti.                                | incorrect     |
| justo    | junto           | Deseo esta casa ya que está más justo a la tuya.                 | incorrect     |

|        |        |                                                                             |           |
|--------|--------|-----------------------------------------------------------------------------|-----------|
| liso   | --     | Su pelo es de liso y suave tacto.                                           | correct   |
| liso   | --     | Vi a la muchacha de liso cabello y la saludé.                               | correct   |
| liso   | lino   | Esa tela es de liso azul.                                                   | incorrect |
| liso   | lino   | Me dio esta chaqueta de liso violeta y me gusta mucho.                      | incorrect |
| misa   | --     | Esa iglesia da la misa del gallo.                                           | correct   |
| misa   | --     | La iglesia da la misa a las ocho.                                           | correct   |
| misa   | mina   | Él tío excava la misa de plata.                                             | incorrect |
| misa   | mina   | Da mucho empleo la misa de tu ciudad.                                       | incorrect |
| pasa   | --     | Se comió la pasa de la bolsa.                                               | correct   |
| pasa   | --     | Masticó mucho la pasa y luego la escupió.                                   | correct   |
| pasa   | pana   | Ella diseñó la pasa que usas.                                               | incorrect |
| pasa   | pana   | Me cosió la pasa de la chaqueta.                                            | incorrect |
| pesa   | --     | Pásame la pesa que está ahí.                                                | correct   |
| pesa   | --     | Coge del suelo sus pesas y álzalas lo más alto que puedas.                  | correct   |
| pesa   | pena   | Padeció la pesa toda su vida.                                               | incorrect |
| pesa   | pena   | El psicólogo alivió sus pesas luego de mucho tiempo.                        | incorrect |
| pesado | --     | El mueble ha pesado más de lo que estimé.                                   | correct   |
| pesado | --     | El paquete ha sido pesado luego del embajaje.                               | correct   |
| pesado | penado | El acta ha pesado su delito.                                                | incorrect |
| pesado | penado | Ese homicidio ha sido pesado de modo muy leve.                              | incorrect |
| pis    | --     | El chaval pide pis cada vez que te ve.                                      | correct   |
| pis    | --     | El bebé pide pis todo el tiempo.                                            | correct   |
| pis    | pin    | El móvil pide pis cada vez que lo usas.                                     | incorrect |
| pis    | pin    | El dispositivo pide pis cada vez que lo utilizas.                           | incorrect |
| piso   | --     | Alquiló aquel piso pequeño que quedaba muy lejos de la ciudad.              | correct   |
| piso   | --     | Alquiló el piso de tu edificio.                                             | correct   |
| piso   | pino   | Taló aquel piso dos años después de que ella se fue.                        | incorrect |
| piso   | pino   | Cultivó el piso hace mucho tiempo.                                          | incorrect |
| pista  | --     | El chico supo la última pista del juego.                                    | correct   |
| pista  | --     | El mago dijo la pista y se fue.                                             | correct   |
| pista  | pinta  | El alcohólico bebió la última pista y se fue.                               | incorrect |
| pista  | pinta  | Se le volcó la pista al suelo.                                              | incorrect |
| plasta | --     | Ella ha amasado la plasta de masa esa.                                      | correct   |
| plasta | --     | Estaba cocida la plasta de pasta que se te cayó.                            | correct   |
| plasta | planta | Es muy pequeña la plasta sexta de tu edificio.                              | incorrect |
| plasta | planta | Se deshojó la plasta de tu tía.                                             | incorrect |
| segado | --     | El césped está segado desde ese día.                                        | correct   |
| segado | --     | Hoy tu empleado usó la hoz y dejó muy segado el césped como le pediste.     | correct   |
| segado | negado | El chico está segado desde que llegaste.                                    | incorrect |
| segado | negado | Tu jefe te dijo hace tiempo que estás muy segado hasta que hoy te despidió. | incorrect |

|       |       |                                                        |           |
|-------|-------|--------------------------------------------------------|-----------|
| seso  | --    | Masticó hasta el seso del bicho aquel.                 | correct   |
| seso  | --    | De todos ellos, fue el que se comió más sesos de vaca. | correct   |
| seso  | seno  | Ella es el seso de la familia.                         | incorrect |
| seso  | seno  | Fue el médico ese el que le puso más sesos a la chica. | incorrect |
| sexo  | --    | La eco desveló el sexo del bebé.                       | correct   |
| sexo  | --    | Su modo de escape fue el sexo y todos lo sabíamos.     | correct   |
| sexo  | nexo  | Ella me explicó el sexo de todo esto.                  | incorrect |
| sexo  | nexo  | Sé que tu abuela es el sexo de tu familia.             | incorrect |
| simio | --    | Él vio a tu amigo vestido de simio este mediodía.      | correct   |
| simio | --    | Aquel tío actúa como el más simio de todos.            | correct   |
| simio | nimio | La despidió debido a ese detalle de simio peso.        | incorrect |
| simio | nimio | Esa chica sabía hasta el más simio detalle.            | incorrect |
| sota  | --    | El mago mezcló la sota de bastos.                      | correct   |
| sota  | --    | Se lo jugó todo a la sota de bastos.                   | correct   |
| sota  | nota  | Ella me dijo la sota del test.                         | incorrect |
| sota  | nota  | El chico leyó cuidadoso toda la sota de su amiga.      | incorrect |
| uso   | --    | Si le doy mucho uso al móvil me aílo de mis amigos.    | correct   |
| uso   | --    | Él le limitó el uso desmedido de los videojuegos.      | correct   |
| uso   | uno   | Ese día destacó mucho uso de su equipo.                | incorrect |
| uso   | uno   | Se lo dice el uso de julio, falta poco.                | incorrect |
| vasco | --    | Ella es la esposa del vasco que viste hace días.       | correct   |
| vasco | --    | Hablé de mi amigo el vasco que vive muy lejos.         | correct   |
| vasco | banco | Su jefe le echó del vasco hoy a mediodía.              | incorrect |
| vasco | banco | Me dio la hipoteca el vasco hace muchos años.          | incorrect |
| vaso  | --    | Le vació su vaso de agua.                              | correct   |
| vaso  | --    | Si la tía limpia su vaso tú haz lo mismo.              | correct   |
| vaso  | vano  | Le dolió su vaso empeño.                               | incorrect |
| vaso  | vano  | Estaba alicaído debido a su vaso deseo sexual.         | incorrect |
| yeso  | --    | Él se quitó medio yeso del pie.                        | correct   |
| yeso  | --    | Ella hizo la estatua de yeso y me gustó muchísimo.     | correct   |
| yeso  | lleno | Ves el vaso medio yeso y eso es lo que deseo.          | incorrect |
| yeso  | lleno | La pelota le dio de yeso a la abuela.                  | incorrect |
