# Supplementary material
Source: publisher figshare collection journal article supplement (https://tandf.figshare.com/articles/dataset/_/14342416)
Supplement: Supplementary file 3 [file 1]

Code .....

## PerroPelo Questionnaire (translated from Spanish)

- 1) When you speak in Spanish, what are the foreign accents you listen to the most? Indicate how many hours per week you listen to each accent.

|                  | YES | NO | Hours per week | Number of speakers with the accent |
|------------------|-----|----|----------------|------------------------------------|
| Chinese-Mandarin |     |    |                |                                    |
| English          |     |    |                |                                    |
| French           |     |    |                |                                    |
| Italian          |     |    |                |                                    |
| German           |     |    |                |                                    |
| Other .....      |     |    |                |                                    |
| Other.....       |     |    |                |                                    |

- 2) If you have answered that you are or have been in contact with a Chinese accent, please answer the following questions. If you answered no, continue to question 3.

2.a) How often do you hear errors in Spanish for each of the following characteristics? Select a number between 1 (never) and 10 (always).

Substitution of a single sound, such as /r/ to /l/. For example:

*Mi hermana tiene un **perro** → Mi hermana tiene un **pelo**.*

Substitution of a single sound, such as /n/ to /s/. For example:

Es una **pena** que el clima sea tan malo. → Es una **pesa** que el clima sea tan malo.

Substitution of one word for another word. For example:

*Mi hermana tiene un **perro** → Mi hermana tiene un **batido**.*

[illegible]

- 2.b) When you are in contact with Chinese native speakers, do you think that you "let pass" (you ignore) the errors that they can commit in Spanish? (1 = never; 10 = always)

[illegible]

2.c) How often do you correct the Spanish errors of Spanish produced by the Chinese native speakers? (1 = never; 10 = always)

[illegible]

3) How often do you think you "let pass" (you ignore) the errors in Spanish produced by foreigners? (1 = never; 10 = always)

[illegible]

4) How often do you correct the errors in Spanish produced by foreigners? (1 = never; 10 = always)

[illegible]

5) Between 1 and 10, how often do you think that Chinese native speakers produce speech errors in one of the following characteristics of Spanish? (1 = never, 10 = always). Please return to the examples on page 1 before answering.

[illegible]

6) From 1 to 10, how reliable did you find the native speakers that you heard in the experiment? (1 = not at all reliable, 10 very reliable)

[illegible]

7) From 1 to 10, how reliable did you find the Chinese native speakers that you heard in the experiment? (1 = not at all reliable, 10 very reliable)

[illegible]

8) From 1 to 10, how much do you trust what the native speakers said in the experiment? (1 = not at all; 10 = a lot)

[illegible]

- 9) From 1 to 10, how much do you trust what the Chinese native speakers said in the experiment? (1 = not at all; 10 = a lot)

|   |   |   |   |   |   |   |   |   |    |
|---|---|---|---|---|---|---|---|---|----|
| 1 | 2 | 3 | 4 | 5 | 6 | 7 | 8 | 9 | 10 |
|   |   |   |   |   |   |   |   |   |    |

- 10) From 1 to 10, how easy it was it to identify word-by-word what the native speakers said during the experiment? (1 = very difficult, 10 = very easy)

|   |   |   |   |   |   |   |   |   |    |
|---|---|---|---|---|---|---|---|---|----|
| 1 | 2 | 3 | 4 | 5 | 6 | 7 | 8 | 9 | 10 |
|   |   |   |   |   |   |   |   |   |    |

- 11) From 1 to 10, how easy it was it to identify word-by-word what the Chinese native speakers said during the experiment? (1 = very difficult, 10 = very easy)

|   |   |   |   |   |   |   |   |   |    |
|---|---|---|---|---|---|---|---|---|----|
| 1 | 2 | 3 | 4 | 5 | 6 | 7 | 8 | 9 | 10 |
|   |   |   |   |   |   |   |   |   |    |

- 12) Have you ever studied Chinese-Mandarin at school?

|     |  |
|-----|--|
| YES |  |
|-----|--|

|    |  |
|----|--|
| NO |  |
|----|--|

If you answered yes, please indicate for how many years: ..... months .....

- 13) Have you been to a country where Chinese-Mandarin is spoken as a first language?

|     |  |
|-----|--|
| YES |  |
|-----|--|

|    |  |
|----|--|
| NO |  |
|----|--|

If you said yes, indicate how many years ....., months ..... or days .....

- 14) What percentage of your friends are foreigners? ..... %

Please write down the definition of each of the following Spanish words.

|    | Word     | Definition |    | Word   | Definition |
|----|----------|------------|----|--------|------------|
| 1  | alma     |            | 29 | mulo   |            |
| 2  | asa      |            | 30 | pala   |            |
| 3  | cala     |            | 31 | palo   |            |
| 4  | caldo    |            | 32 | pasa   |            |
| 5  | calma    |            | 33 | pelo   |            |
| 6  | casa     |            | 34 | pesa   |            |
| 7  | castidad |            | 35 | pesado |            |
| 8  | casto    |            | 36 | pis    |            |
| 9  | costado  |            | 37 | piso   |            |
| 10 | culo     |            | 38 | pista  |            |
| 11 | dos      |            | 39 | plasta |            |
| 12 | ela      |            | 40 | polo   |            |
| 13 | este     |            | 41 | segado |            |
| 14 | gala     |            | 42 | seso   |            |
| 15 | gasa     |            | 43 | sexo   |            |
| 16 | halo     |            | 44 | simio  |            |
| 17 | hielo    |            | 45 | sol    |            |
| 18 | justa    |            | 46 | sota   |            |
| 19 | justo    |            | 47 | suelo  |            |
| 20 | lata     |            | 48 | tala   |            |
| 21 | led      |            | 49 | talado |            |
| 22 | ley      |            | 50 | tela   |            |
| 23 | lima     |            | 51 | tila   |            |
| 24 | liso     |            | 52 | toldo  |            |
| 25 | lobo     |            | 53 | uso    |            |
| 26 | loca     |            | 54 | vasco  |            |
| 27 | mal      |            | 55 | vaso   |            |
| 28 | misa     |            | 56 | yeso   |            |
